# Supplementary material for: Layer-controlled continuous MoS2 growth using a spin-coatable metal precursor buffer
Source: Royal Society of Chemistry journal article supplement (doi:10.1039/d5nr01193k), 2025-01-01
Supplement: d5nr01193k1.pdf [file d5nr01193k1.pdf]

## Supplementary Information

# Layer-Controlled Continuous MoS<sub>2</sub> Growth using Spin-Coatable Metal Precursor Buffer

*Dong Hwan Kim,<sup>a,†</sup> Jinyoung Seo,<sup>b,†</sup> Yoonbeen Kang,<sup>b</sup> Bumjun Lee,<sup>b</sup> and Sang-Yong Ju<sup>a,b,\*</sup>*

<sup>a</sup> Graduate Program of Semiconductor Science and Engineering, Yonsei University, Seoul 03722, Republic of Korea; <sup>b</sup> Department of Chemistry, Yonsei University, Seoul 03722, Republic of Korea

<sup>†</sup> Equally contributed to this work.

\*To whom correspondence should be addressed; E-mail: syju@yonsei.ac.kr

### Note S1: Full explanation of Fig. S1

The formation of uniform MoS<sub>2</sub> films through CVD growth is significantly influenced by the hydrophilicity of the substrate, which enables uniform hydrogen bonds with metal precursor adsorbates. AFM measurements were first conducted on both O<sub>2</sub> plasma-treated and untreated (bare) 285 nm-thick SiO<sub>2</sub>/Si substrates. The resulting AFM height profiles (Fig. S1b–S1c) indicate that the surface topographies are comparable, with both substrates exhibiting an average surface roughness ( $\langle R \rangle$ ) of approximately 0.2 nm. Measurements of water droplet contact angles (Fig. S1d) indicated that the O<sub>2</sub> plasma-treated substrate is hydrophilic (8.5°) compared to a non-treated bare substrate (73.3°). Fig. S1a shows the optical image of a hydrophilic patterned CVD-grown MoS<sub>2</sub> sample. This sample was prepared after the CVD step using a cross-marked hydrophilic patterned substrate, achieved by O<sub>2</sub>-plasma treatment with a metal shadow mask (inset), followed by spin-coating the MoO<sub>3</sub>/SC solution over the entire substrate (see Methods). The O<sub>2</sub> plasma-treated region exhibits different optical contrasts compared to the untreated areas.

High-magnification optical images (Fig. S1e–S1f) reveal that untreated areas show presumably MoO<sub>3</sub> particles, whereas O<sub>2</sub> plasma-treated regions form a continuous MoS<sub>2</sub> film. Raman spectra (Fig. S1g) confirm that the treated region displays the characteristic E<sub>2g</sub><sup>1</sup> and A<sub>1g</sub> bands of MoS<sub>2</sub> at 384.9 and 405.9 cm<sup>-1</sup>, respectively, with a peak separation of 21.0 cm<sup>-1</sup> indicating SL or BL MoS<sub>2</sub>. The deconvoluted band at 375.1 cm<sup>-1</sup> (purple) corresponds to a defective longitudinal optical (LO) mode. These results highlight that a hydrophilic substrate supports continuous MoS<sub>2</sub> growth through MoO<sub>3</sub>/SC spin-coating, while a hydrophobic substrate leads to particle aggregation. The hydrophilic region retains its pattern from spin-coating to CVD growth, demonstrating patterned MoS<sub>2</sub> film formation.

## Note S2: Full explanation of Fig. S4a–S4d

XPS measurements were conducted to investigate the chemical states of sodium and SC. For this purpose, a  $\text{Na}_2\text{MoO}_4/\text{SC}$  dispersion drop-cast on 285 nm-thick  $\text{SiO}_2/\text{Si}$  substrate (namely  $\text{Na}_2\text{MoO}_4/\text{SC}$  drop-cast) and a  $\text{MoS}_2$  film were analyzed alongside as-received powders of SC,  $\text{MoO}_3$ , and  $\text{Na}_2\text{MoO}_4$ . The offset, normalized XPS survey spectra of these five samples are shown in Fig. S4a. These spectra reflect the relative sensitivity factor and electron counts of each orbital. Key regions of interest—S  $2p$ , Mo  $3d$ , and Na  $1s$ —are highlighted. It is also noteworthy that all samples, including  $\text{MoO}_3$  and  $\text{Na}_2\text{MoO}_4$ , exhibit adventitious carbon in their spectra.

Fig. S4b represents the detailed S  $2p$  spectra. Only the  $\text{MoS}_2$  sample displays a spin-orbit doublet corresponding to S  $2p_{3/2}$  and S  $2p_{1/2}$  at binding energies of 161.1 and 162.2 eV, respectively, consistent with the value reported for powder-phase  $\text{MoS}_2$ .<sup>1</sup> Fig. S4c represents the detailed Mo  $3d$  spectra. No Mo signal is detected for SC, whereas  $\text{MoO}_3$ ,  $\text{Na}_2\text{MoO}_4$ , and the drop-cast samples exhibit a spin-orbit doublet arising from  $\text{Mo}^{6+}$  (Mo  $3d_{5/2}$  and Mo  $3d_{3/2}$ ), confirming the Mo(VI) oxidation state. In contrast, the  $\text{MoS}_2$  film features three distinct peaks: a  $\text{Mo}^{4+}$  spin-orbit doublet at 228.2 eV ( $3d_{5/2}$ ) and 231.3 eV ( $3d_{3/2}$ ) with 3.1 eV separation, and an additional singlet peak at 225.3 eV corresponding to S  $2s$ —characteristic of 2H phase  $\text{MoS}_2$ .<sup>2</sup>

Lastly, Fig. S4d display the detailed Na  $1s$  spectra. Except for  $\text{MoO}_3$ , which lacks a significant sodium signal, all other samples exhibit well-defined Na peaks. These peaks show a progressive blue shift in binding energy, ranging from 1070.2 eV in SC to 1071.4 eV in the  $\text{MoS}_2$  film. The Na  $1s$  peak at 1071.4 eV corresponds to neutral sodium, as expected for elemental sodium.<sup>3</sup> In comparison, powdery  $\text{Na}_2\text{MoO}_4$  and  $\text{Na}_2\text{MoO}_4/\text{SC}$  drop-coat samples show a 0.4 eV blue shift, consistent with observations from spin-coated  $\text{Na}_2\text{MoO}_4$ .<sup>4</sup>

### Note S3: Full explanation of Fig. S5–S7

In the  $\text{MoO}_3$  only case, although spin-coating was successful on the  $\text{O}_2$ -plasma treated substrate, the half spin-coated sample exhibits that slight darkening of optical contrast occurs across several positions in optical images during the exposure to constant  $T_{\text{CVD}}$  at  $800^\circ\text{C}$  over 10 min. (Fig. S5b–S5d). Furthermore,  $C_{\text{R}}$  trends of positions 1, 2, and 3 exhibit weak exponential changes much below the SL region (Fig. S5e), indicating discontinuous formation of  $\text{MoS}_2$  if any. The optical image (Fig. S5f) shows that the spin-coat area possesses contrast presumably owing to  $\text{MoO}_3$  and  $\text{MoS}_2$ . Raman spectra exhibit that only the interfacial position exhibits weak and characteristic  $\text{MoS}_2$  bands at  $\sim 385.8$  and  $\sim 405.5\text{ cm}^{-1}$ , indicating SL  $\text{MoS}_2$ , while other positions, such as 2 and 3 do not show any bands except for Si bands. This result indicates that the in situ formation of sodium from the SC plays a role in the formation of a continuous  $\text{MoS}_2$  at low temperatures.

For the case of  $\text{Na}_2\text{MoO}_4$  without SC, we observed the formation of discontinuous ML  $\text{MoS}_2$  from a 10 mM  $\text{Na}_2\text{MoO}_4$  solution, consistent with the literature.<sup>5</sup> First, as shown in Fig. S6a, overall  $t_{\text{rxn}}$  requires much longer time over 20 min at  $800^\circ\text{C}$ . A series of optical images (Fig. S6b–S6d) display a slight darkening of the uniformly spin-coated area over  $t_{\text{rxn}}$ . Furthermore,  $C_{\text{R}}$  trends of positions 1, 2, and 3 (Fig. S6e) show slow changes from 0 to 7, which is much below SL  $C_{\text{R}}$  region. Unlike the case of  $\text{MoO}_3$  only, positions farther away from the interface are much darker. To check the growth in the central region of the spin-coat, the optical image (Fig. S6f) displays that discontinuous micrometer-sized grains are grown. Raman spectra exhibit that while the other positions indicated in Fig. S6b and S6f do not show characteristic  $\text{MoS}_2$  peaks, positions 3 and 4 shows  $\text{E}^1_{2\text{g}}$  and  $\text{A}^1_{\text{lg}}$  bands of  $\text{MoS}_2$ . Position 4 shows two bands at  $383.6$  and  $409.8\text{ cm}^{-1}$  (interpeak separation:  $26.2\text{ cm}^{-1}$ ), indicating ML  $\text{MoS}_2$ , whereas position 3 displays  $388.0$  and  $407.7\text{ cm}^{-1}$  (interpeak separation:  $19.7\text{ cm}^{-1}$ ), indicating SL  $\text{MoS}_2$ . This result indicates that  $\text{Na}_2\text{MoO}_4$

compared to  $\text{Na}_2\text{MoO}_4/\text{SC}$  promotes localized ML  $\text{MoS}_2$  across the sample. This also indicates that uniform coating alone cannot explain the uniform continuous growth of  $\text{MoS}_2$  promoted by  $\text{Na}_2\text{MoO}_4/\text{SC}$ . This might be related to the porous structure of sodium catalyst promoted by SC.<sup>6</sup>

For the case of  $\text{MoO}_3$  with SDS, which is a well-known dispersant, similar growth behavior to the case of  $\text{MoO}_3$  without SC was witnessed, considering the interfacial formation of  $\text{MoS}_2$ : although the initial spin-coating of  $\text{MoO}_3/\text{SDS}$  dispersion was successful, the subsequent sulfurization of the precursor did not lead to the formation of a continuous  $\text{MoS}_2$ . Along the growth parameter change over 10 min from 400 to 800 °C (Fig. S7a), a series of optical images (Fig. S7b–S7d) shows a lightened contrast trend and similar contrast between the spin-coat and the bare areas at the end, presumably due to the decomposition (or sublimation) of SDS. Quantitative  $C_R$  trend (Fig. S7e) of each position indicated in (Fig. S7b) also shows changes from 8 to near 0. This indicates that desorption of the  $\text{MoO}_3/\text{SDS}$  spin-coat occurs. The optical image of the central area from the spin-coat (Fig. S7f) does not show any noticeable feature. Raman spectra (Fig. S7g) of the interface and center exhibit no  $\text{MoS}_2$  bands except for the position 1 which is the interface. This indicates that sodium-containing dispersant alone cannot explain the formation of  $\text{MoS}_2$ . The  $\text{p}K_a$  of hydrogensulfate in the SDS is  $\sim 2$ , which is strongly acidic. Therefore, the cation exchange between  $\text{H}_2\text{MoO}_4$  and sodium of the sulfate group in SDS is prohibited. The dispersant having buffer capability at mildly acidic conditions would be an appropriate choice for future research.

**Fig. S1** Substrate hydrophilicity effect on MoS<sub>2</sub> formation. (a) Optical images of patterned MoS<sub>2</sub> film formation via CVD growth after O<sub>2</sub>-plasma treatment of a bare substrate using a metal shadow mask (inset), followed by spin-coating with a 6 mM MoO<sub>3</sub>/SC solution. The pattern exhibits non-distinct boundaries, likely due to reactive ion diffusion at the interface of the shadow metal mask. (b–c) AFM height images of (b) O<sub>2</sub> plasma-treated and (c) bare 285 nm-thick SiO<sub>2</sub>/Si substrates. Average surface roughness <R> is provided. (d) Water contact angle comparison between (top) O<sub>2</sub> plasma-treated and (bottom) untreated substrates. High-magnification optical images of (e) the O<sub>2</sub> plasma-treated area and (f) the untreated area. (g) Offset Raman spectra of (top) the O<sub>2</sub> plasma-treated area and (bottom) the untreated area. The spectrum was deconvoluted using Lorentzian fittings. Experimental data are shown with empty circles, and the red curve represents the sum of each Lorentzian peak.

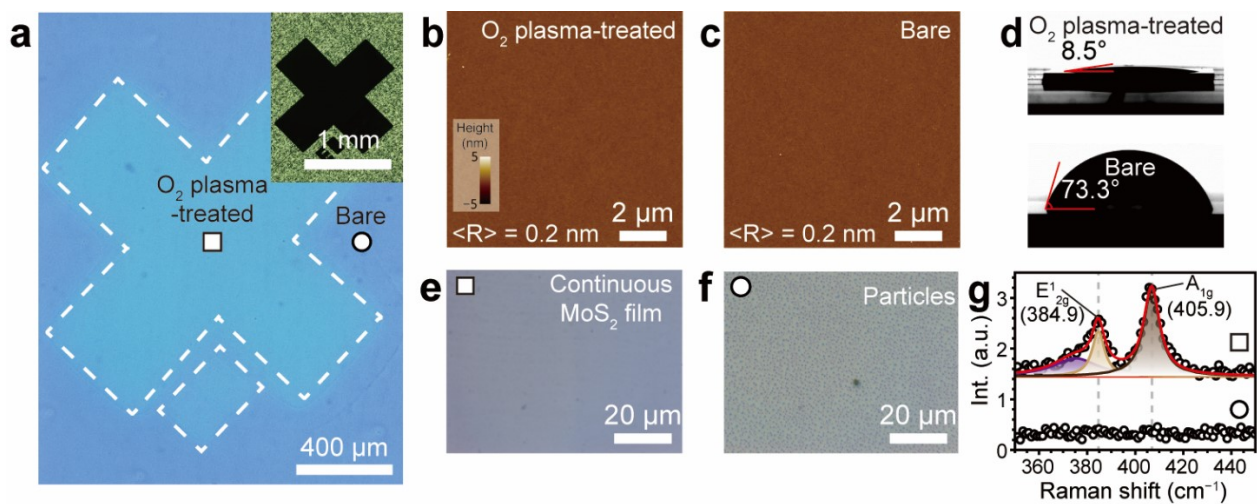

**Fig. S2** Comparison of offset AFM height profiles. (a) Offset AFM height profiles of  $\text{Na}_2\text{MoO}_4/\text{SC}$  spin-coats as a function of  $\text{Na}_2\text{MoO}_4/\text{SC}$  concentrations (i.e., 4, 6, 8, 10 mM). Offset heights: 5 nm. (b) Plot of adsorbate particle density and  $V$  as a function of  $\text{Na}_2\text{MoO}_4/\text{SC}$  concentrations (i.e., 4, 6, 8, 10 mM). (c) Offset AFM height profiles of  $\text{MoS}_2$  samples prepared from the different  $\text{Na}_2\text{MoO}_4/\text{SC}$  concentrations (i.e., 4, 6, 8, 10 mM).

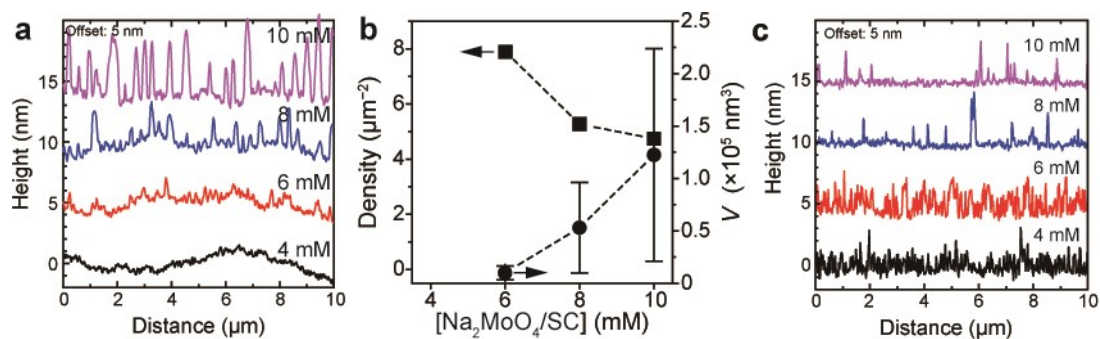

**Fig. S3** SEM image and energy dispersive X-ray spectroscopy (EDS). (a) SEM image of continuous MoS<sub>2</sub> film and (b) map of Na K series, (c) map of Mo L series, (d) map of S K series. (e) Atomic percentages of each atom.

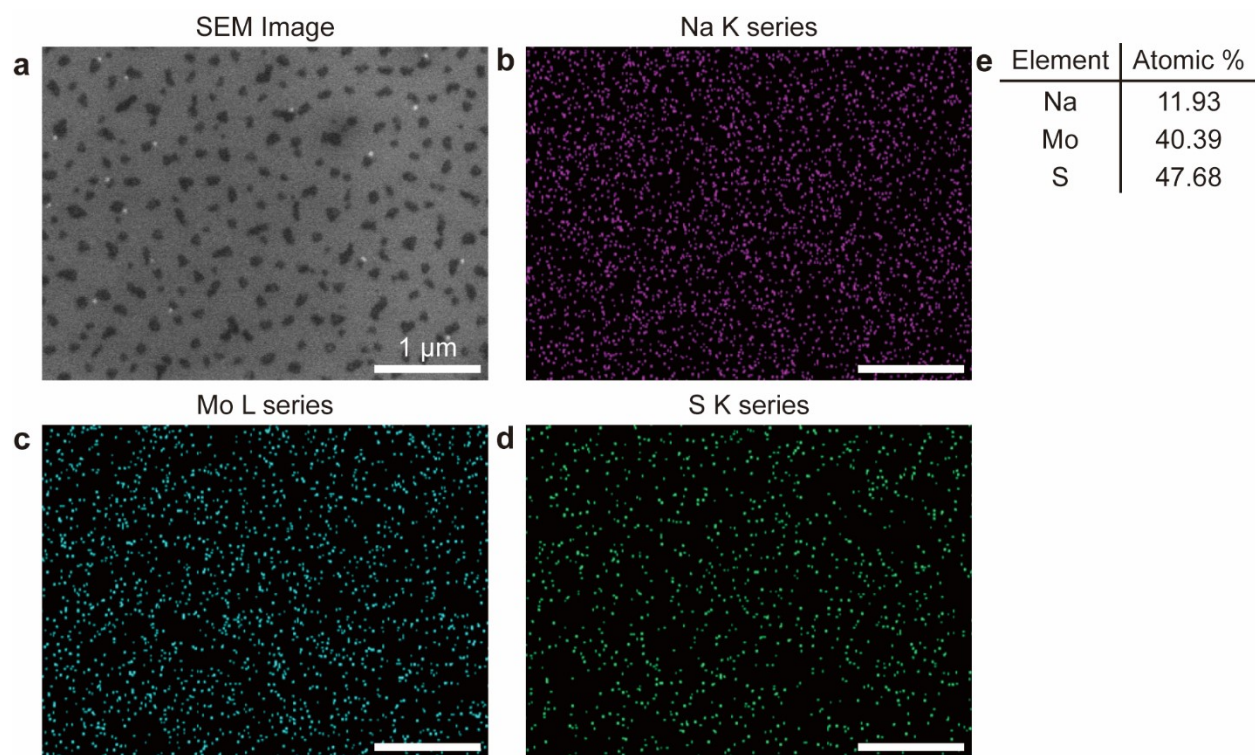



**Fig. S4** XPS measurements for the chemical nature of sodium and SC. (a) XPS survey spectra of SC, MoO<sub>3</sub>, Na<sub>2</sub>MoO<sub>4</sub>, Na<sub>2</sub>MoO<sub>4</sub>/SC drop-cast, and MoS<sub>2</sub> film. Note that the first three are as-received powdery samples, and other two samples are placed on the 285 nm-thick SiO<sub>2</sub>/Si substrate. (b–d) XPS detailed spectra of (b) S 2*p*, (c) Mo 3*d*, and (d) Na 1*s* regions.

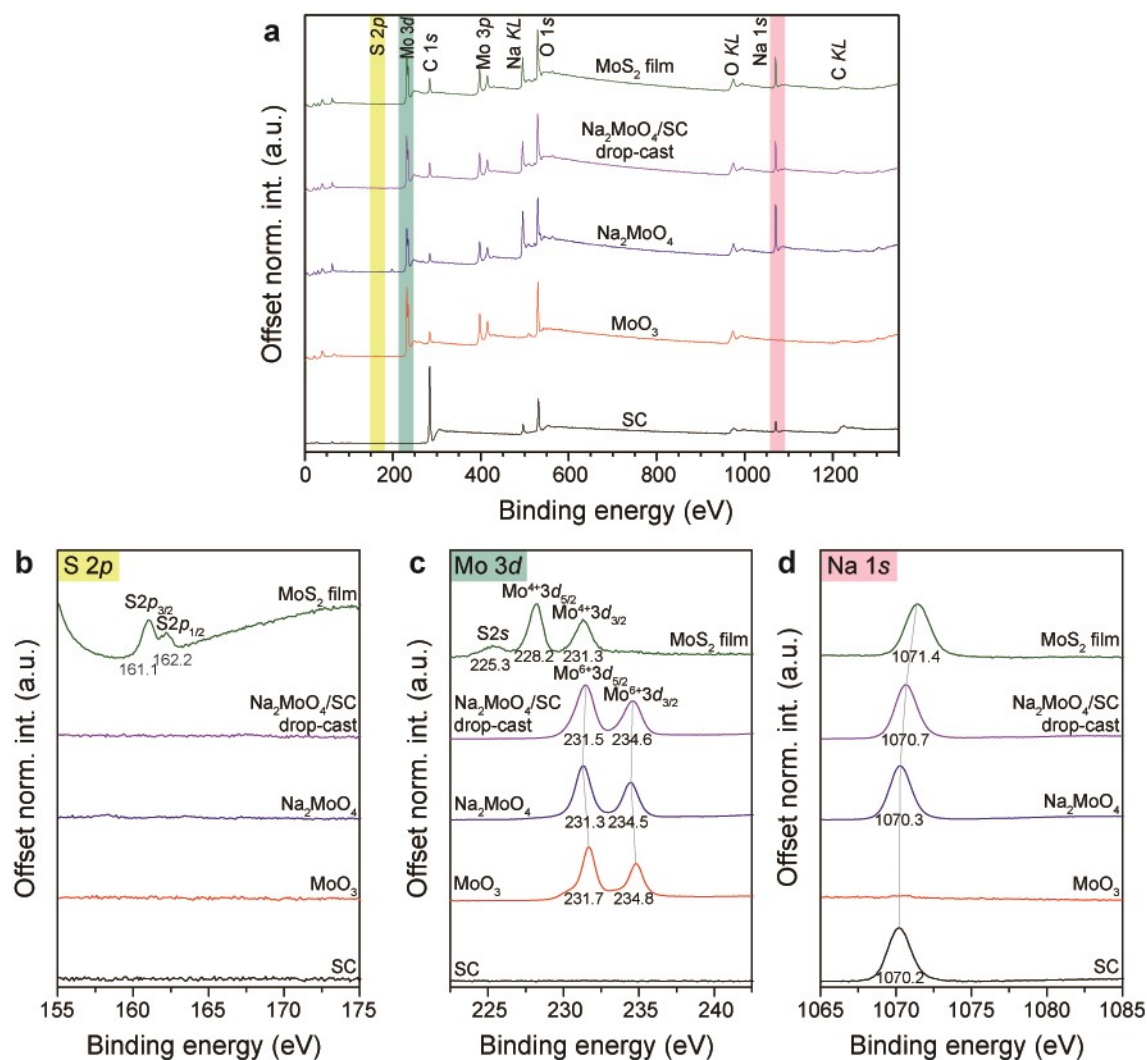

**Fig. S5** Attempted MoS<sub>2</sub> growth from a 6 mM MoO<sub>3</sub> dispersion without SC. (a) Profiles of programmed parameters ( $T_{\text{CVD}}$ ,  $T_{\text{s}}$ , and  $F_{\text{Ar}}$ ) during the ICVDM reaction. The time point corresponding to the optical images is marked. Real-time optical images captured at  $t_{\text{rxn}}$  = (b) 20 s, (c) 3 min 40 s, and (d) 8 min. (e)  $C_{\text{R}}$  trends selected positions from (b), plotted as a function of  $t_{\text{rxn}}$ . (f) Optical image near the interface region after the ICVDM sulfurization. (g) Offset normalized Raman spectra corresponding to the positions in (b). Inset: Zoomed-in Raman spectrum from position 1. Asterisks denote vibrational bands originating from the Si substrate.

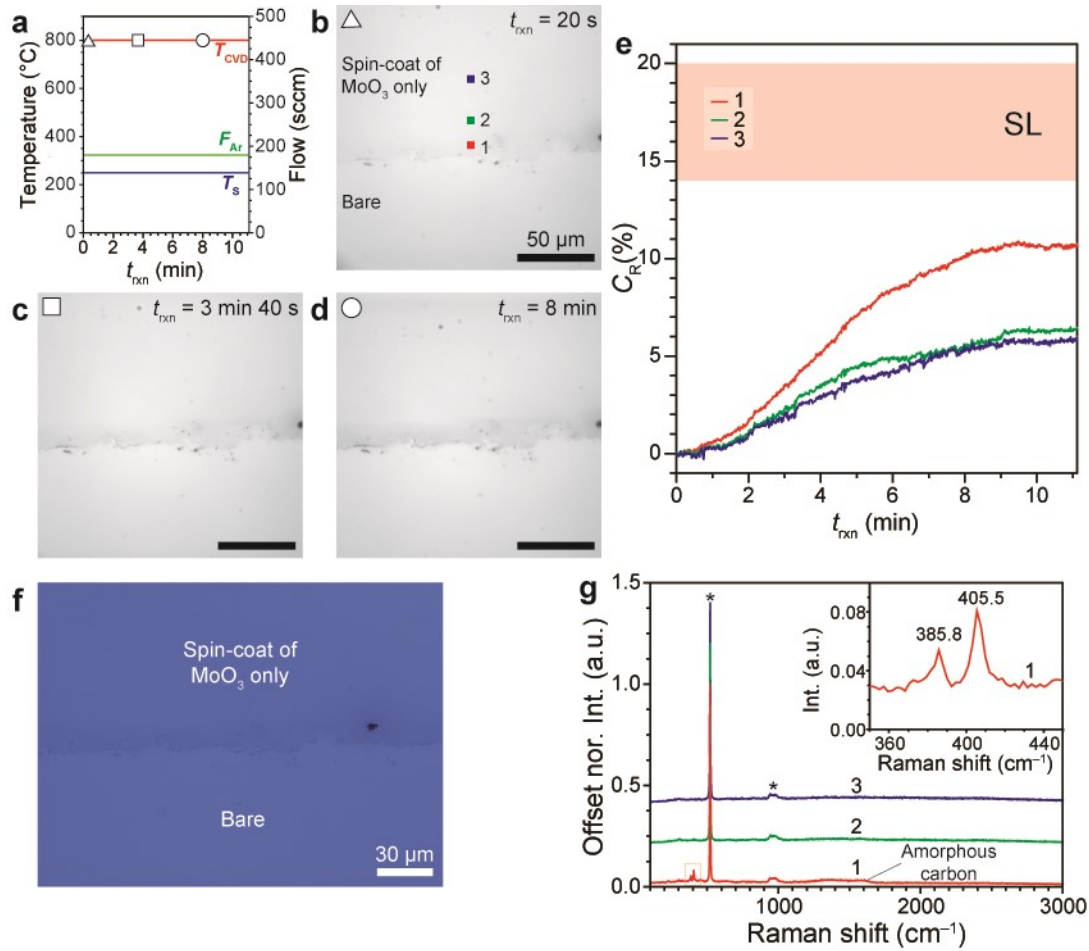

**Fig. S6** MoS<sub>2</sub> growth from a 10 mM Na<sub>2</sub>MoO<sub>4</sub> dispersion without SC. (a) Profiles of programmed parameters ( $T_{\text{CVD}}$ ,  $T_{\text{S}}$ , and  $F_{\text{Ar}}$ ) during the ICVDM reaction. The time point corresponding to the optical images is marked. Real-time optical images of MoS<sub>2</sub> film at  $t_{\text{rxn}}$  = (b) 0 min, (c) 13 min, and (d) 20 min. (e)  $C_{\text{R}}$  trends selected positions from (b), plotted as a function of  $t_{\text{rxn}}$ . (f) Optical image near the interface region. Inset: the central region of the spin-coat after the ICVDM sulfurization. (g) Offset normalized Raman spectra corresponding to the positions in (b) and (f). Inset: Raman spectra of MoS<sub>2</sub> vibrational regions in positions 3 and 4. Asterisks indicate the vibrational bands originating from the Si substrate.

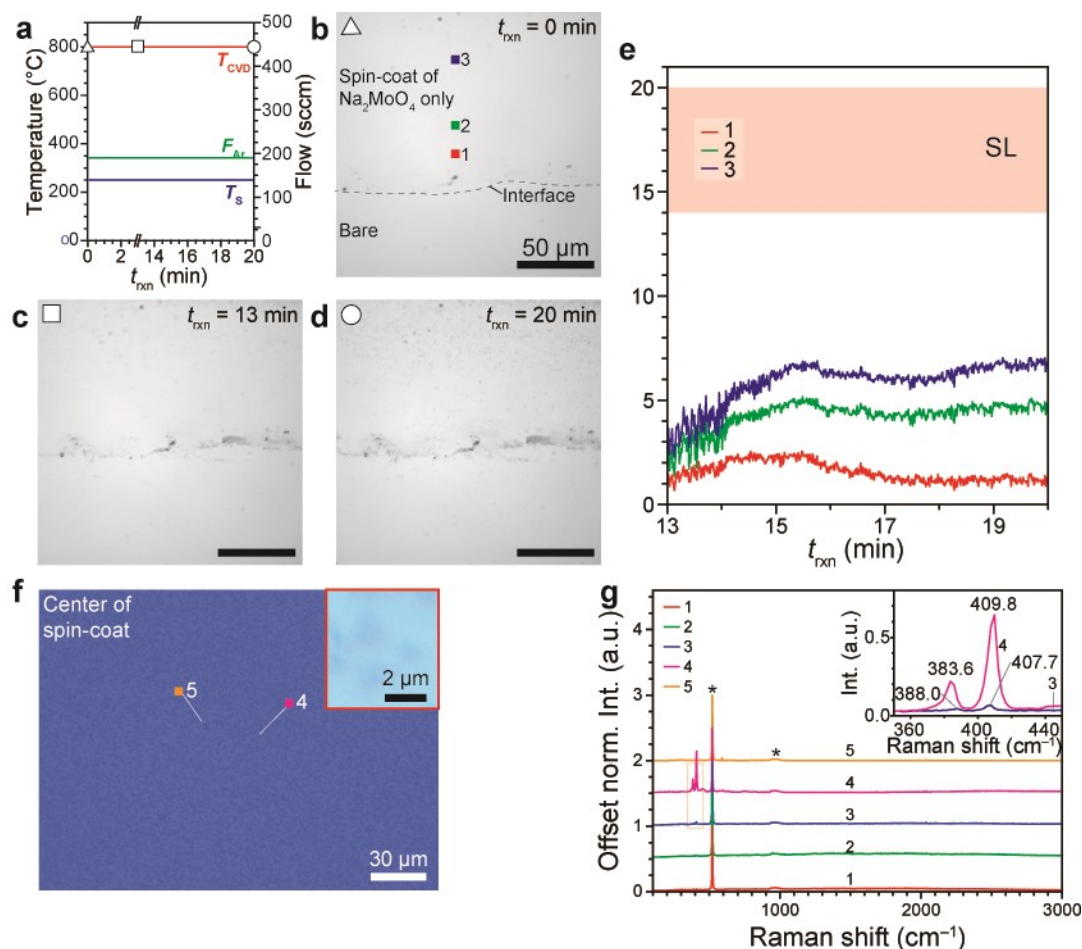

**Fig. S7** CVD growth of MoS<sub>2</sub> from the 6 mM MoO<sub>3</sub> dispersion with 1 wt.% SDS. (a) Programming parameter ( $T_{\text{CVD}}$ ,  $T_{\text{S}}$ , and  $F_{\text{Ar}}$ ) profiles during ICVDM reaction. The  $t_{\text{rxn}}$  for the optical image is indicated. Real-time optical images of MoS<sub>2</sub> film at  $t_{\text{rxn}}$  = (b) 0 min, (c) 4 min, and (d) 8 min. (e)  $C_{\text{R}}$  trends of the positions in the optical images in (b) according to  $t_{\text{rxn}}$ . Spikes denoted by section sign originate from temporal defocusing. (f) Optical image at the center of the spin-coat. (g) Offset Raman spectra indicated in the optical images in (b) and (f). Inset: Zoomed-in Raman spectrum of position 1. Asterisks denote vibrational bands originating from the Si substrate.

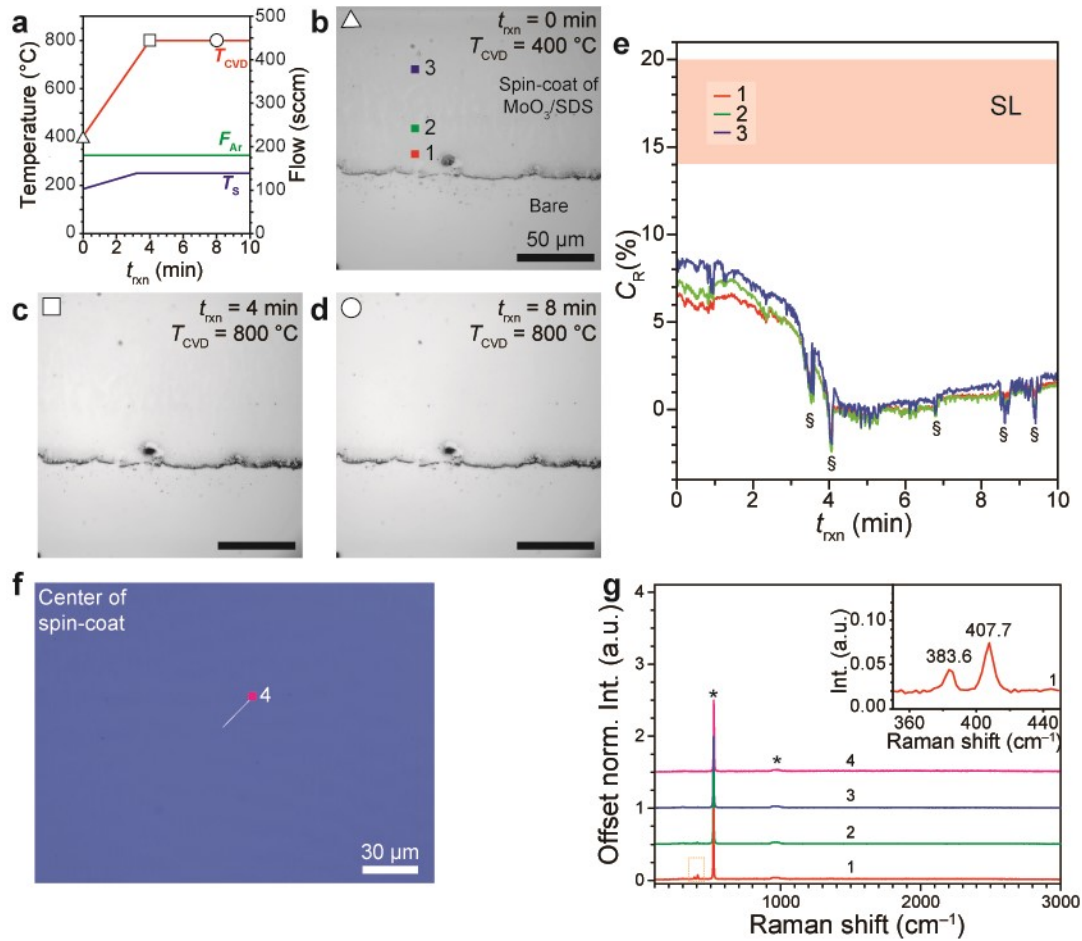

**Svideo 1. A movie clip of growing MoS<sub>2</sub> film with spin-coated and bare areas.** Conditions: 30 frames per second (fps), 800 °C, 50× magnification.

## Cited references

1. M. Jeong, S. Kim and S.-Y. Ju, *RSC Adv.*, 2016, **6**, 36248-36255.
2. G. Eda, H. Yamaguchi, D. Voiry, T. Fujita, M. Chen and M. Chhowalla, *Nano Lett.*, 2011, **11**, 5111-5116.
3. B. V. Crist, Basic XPS Information Section, <https://xpsdatabase.net/sodium-na-z11>, (accessed 2025.05.07.).
4. R. A. Kalt, A. Arcifa, C. Wäckerlin and A. Stemmer, *Nanoscale*, 2023, **15**, 18871-18882.
5. S. Li, Y.-C. Lin, X.-Y. Liu, Z. Hu, J. Wu, H. Nakajima, S. Liu, T. Okazaki, W. Chen, T. Minari, Y. Sakuma, K. Tsukagoshi, K. Suenaga, T. Taniguchi and M. Osada, *Nanoscale*, 2019, **11**, 16122-16129.
6. J. Oh, M. Park, Y. Kang and S.-Y. Ju, *ACS Nano*, 2024, **18**, 19314-19323.
